# Supplementary material for: An ultrasensitive label-free photoelectrochemical sensor based on Ag2O-sensitized WO3/TiO2 acicular composite for AFB1 detection
Source: Royal Society of Chemistry journal article supplement (doi:10.1039/c9ay01277j), 2019-01-01
Supplement: c9ay01277j1.pdf [file c9ay01277j1.pdf]

An ultrasensitive label-free photoelectrochemical sensor based  
on Ag<sub>2</sub>O sensitized WO<sub>3</sub>/TiO<sub>2</sub> acicular composite for detection  
of AFB1

Xin Liu, Dawei Fan\*, Shengquan Duan, Chunzhu Bao, Huan Wang, Xueying Wang,  
Xu Sun, Qin Wei\*

*Key Laboratory of Interfacial Reaction & Sensing Analysis in Universities of  
Shandong, School of Chemistry and Chemical Engineering, University of Jinan, Jinan  
250022, China*

**\*Corresponding author**

E-mail: jndxfandawei@126.com (D. Fan) & sdjndxwq@163.com (Q.  
Wei)

Tel: +86-531-82760510

## 1. Materials and reagents

Fluorine-doped SnO<sub>2</sub> transparent conductive glass (FTO) was obtained from Zhuhai Kay-woo Electronic Components Co., Ltd., China. Bovine serum albumin (BSA) was obtained from Sigma-Aldrich (Beijing, China). Thioglycolic acid (TGA) was obtained from Tianjin Kermel Chemical Reagent Co., Ltd. 1-ethyl-3-(3-dimethylaminopropyl) carbodiimide hydrochloride (EDC) and N-hydroxysuccinimide (NHS) were obtained from Aladdin Reagent Database Inc (Shanghai, China). Phosphate buffered saline (PBS, 1/15 mol/L KH<sub>2</sub>PO<sub>4</sub> and 1/15 mol/L Na<sub>2</sub>HPO<sub>4</sub>) containing GSH was used as an electrolyte for the PEC measurements.

## 2. Apparatus

Electrochemical impedance spectroscopy (EIS) analysis was performed on an RST5200F electrochemical workstation (Zhengzhou Shiruisi Technology Co., Ltd, China) with a three-electrode system in a 5.0 mmol/L [Fe(CN)<sub>6</sub>]<sup>3-/4-</sup> solution containing 0.10 mol/L KCl. Scanning electron microscope (SEM) images and energy dispersive spectrometry (EDS) were obtained using a field emission SEM (Zeiss, Germany). X-ray diffraction (XRD) patterns were collected on a D8 advance X-ray diffractometer (Bruker AXS, Germany). UV-vis spectra were obtained on a Shimadzu UV-3101PC spectrometer (Japan).

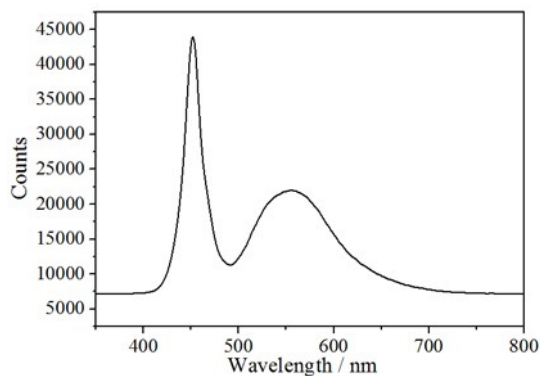

**Fig. S1.** Wavelength range of the LED lamp resource.

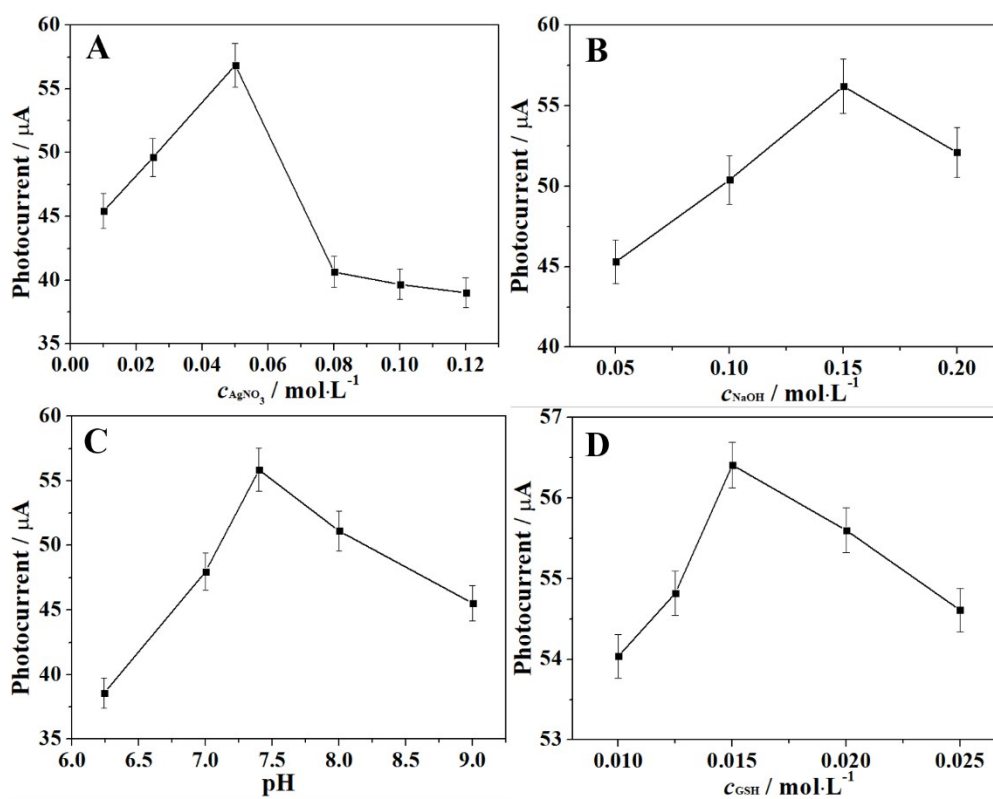

**Fig. S2** Effects of concentration of (A)  $\text{AgNO}_3$  and (B)  $\text{NaOH}$ , (C) pH and (D) concentration of GSH in the PBS buffer solution on the photocurrent response of the  $\text{FTO}/\text{WO}_3/\text{TiO}_2/\text{Ag}_2\text{O}$  electrode

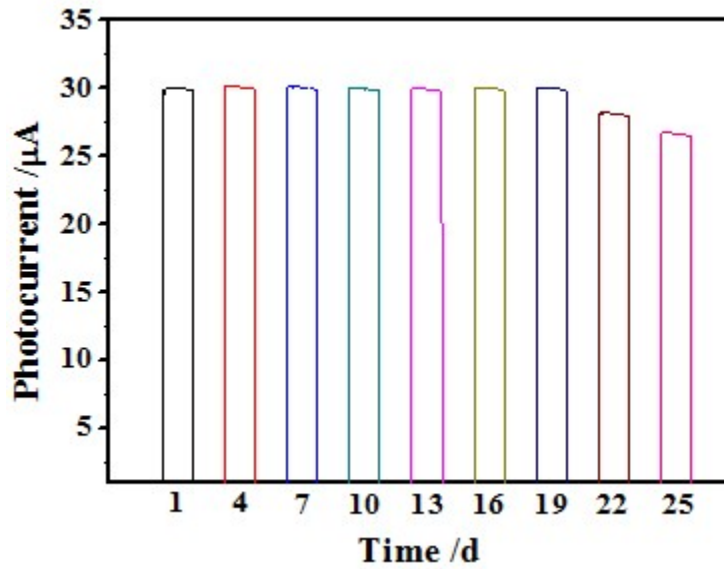

**Fig. S3.** The life time of the label-free PEC sensor.

**Table S1** Simulation parameters of the equivalent circuit components

| Electrode                                                             | $R_s$<br>( $\Omega$ ) | $R_{et}$<br>( $\Omega$ ) | $C_{dl}$<br>(F)        | $Z_w$    |
|-----------------------------------------------------------------------|-----------------------|--------------------------|------------------------|----------|
| FTO                                                                   | 56.43                 | 123                      | $5.849 \times 10^{-6}$ | 0.008091 |
| FTO/ $WO_3$                                                           | 57.76                 | 515.4                    | $6.716 \times 10^{-6}$ | 0.001232 |
| FTO/ $WO_3$ / $TiO_2$                                                 | 58.34                 | 938                      | $3.189 \times 10^{-5}$ | 0.005060 |
| FTO/ $WO_3$ / $TiO_2$ / $Ag_2O$                                       | 56.12                 | 979.4                    | $6.758 \times 10^{-6}$ | 0.001867 |
| FTO/ $WO_3$ / $TiO_2$ / $Ag_2O$ /TGA                                  | 55.27                 | 1220                     | $3.083 \times 10^{-6}$ | 0.002619 |
| FTO/ $WO_3$ / $TiO_2$ / $Ag_2O$ /TGA/(EDC/NHS)                        | 55.89                 | 2062                     | $2.873 \times 10^{-5}$ | 0.001579 |
| FTO/ $WO_3$ / $TiO_2$ / $Ag_2O$ /TGA/(EDC/NHS)/ $Ab_1$                | 57.92                 | 3364                     | $2.981 \times 10^{-5}$ | 0.003279 |
| FTO/ $WO_3$ / $TiO_2$ / $Ag_2O$ /TGA/(EDC/NHS)/ $Ab_1$ /<br>BSA       | 56.47                 | 3374                     | $2.792 \times 10^{-5}$ | 0.001204 |
| FTO/ $WO_3$ / $TiO_2$ / $Ag_2O$ /TGA/(EDC/NHS)/ $Ab_1$ /<br>BSA/ AFB1 | 58.89                 | 5121                     | $2.847 \times 10^{-5}$ | 0.002315 |
